# Supplementary material
Source: Springer Nature journal article supplement (https://www.springermedizin.de/resource/supplementary/12876_2013_914_MOESM3_ESM.pdf/9438034)
Supplement: MOESM3 [file 9438034]

CP patients with dilated pancreatic duct  
( $\geq 5\text{mm}$ ) and moderate pain  
**REGISTRATION & FOLLOW-UP**

Patient meeting the randomization criteria  
(newly developed need for opioid analgesics)  
**RANDOMIZATION**

**Group A**  
**Early surgical intervention**

Enlarged pancreatic head ( $\geq 4\text{cm}$ )

Yes

Frey procedure

No

Pancreatico-  
jejunostomy

**Group B**  
**Optimal Current Step-up Practice**

**Step 1. Optimal medical management**

- Optimal pain medication (WHO pain ladder)
- Co-medication for neuropathic pain
- Dietary advice
- Management of pancreatic insufficiency

**Failure of medical management**

- Unsatisfactory pain control, or
- Clinically unacceptable side-effects

**Step 2. Endoscopic intervention**

- ERCP with sphincterotomy, and
- Dilatation of strictures (if necessary)
- Placement of pancreatic duct stent
- ESWL for large intraductal stones

**Failure of endoscopic treatment**

- Unsatisfactory pain control

**Step 3. Surgical intervention**  
(as in group A)
